# Supplementary material for: Biogeochemical and biophysical responses to episodes of wildfire smoke from natural ecosystems in southwestern British Columbia, Canada
Source: Copernicus journal article supplement (doi:10.5194/acp-2021-641), 2021-10-19
Supplement: Supplementary file 1 [file acp-2021-641-supplement.pdf]

Supplement of

## Biogeochemical and biophysical responses to episodes of wildfire smoke from natural ecosystems in southwestern British Columbia, Canada

Sung-Ching Lee et al.

Correspondence to: Sung-Ching Lee (sungching.lee@geog.ubc.ca)

### 1 Weather

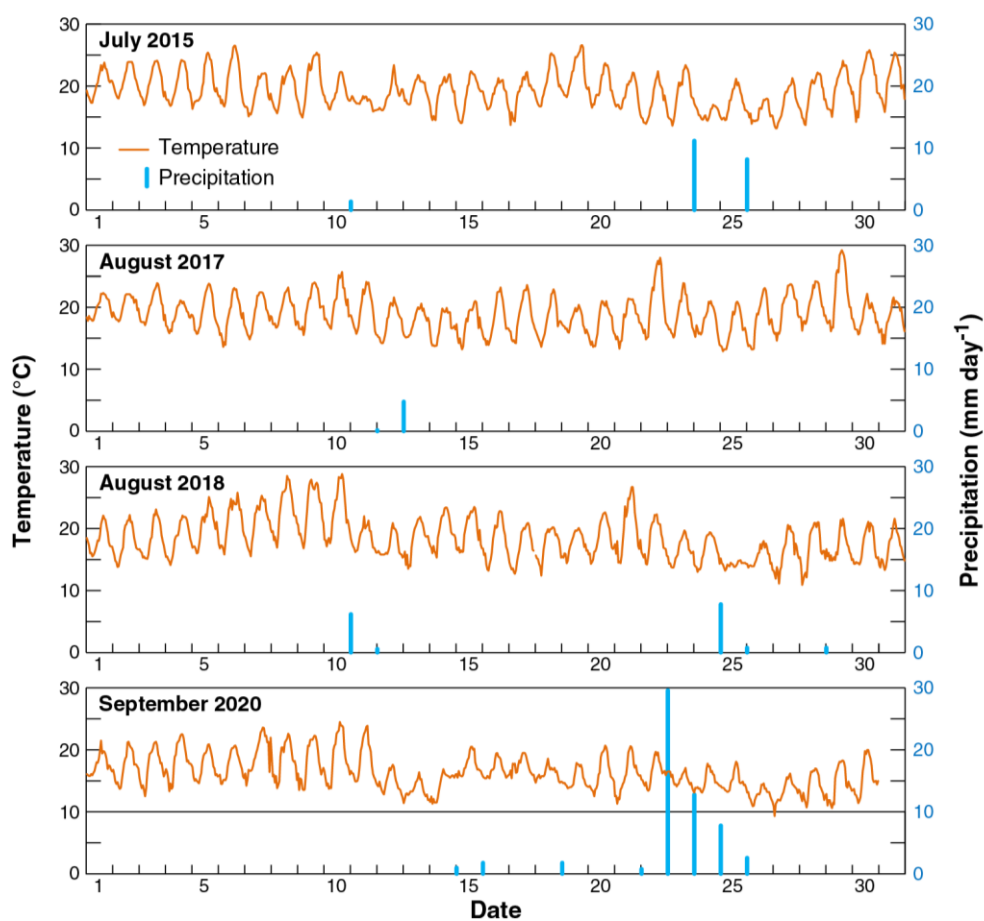

**Figure S1.** Hourly air temperature and daily precipitation over the wildfire smoke episodes in 2015, 2017, 2018, and 2020 at Buckley Bay (the forest site) and at Burns Bog (the peatland site).

## 2 Monthly course of measured variables

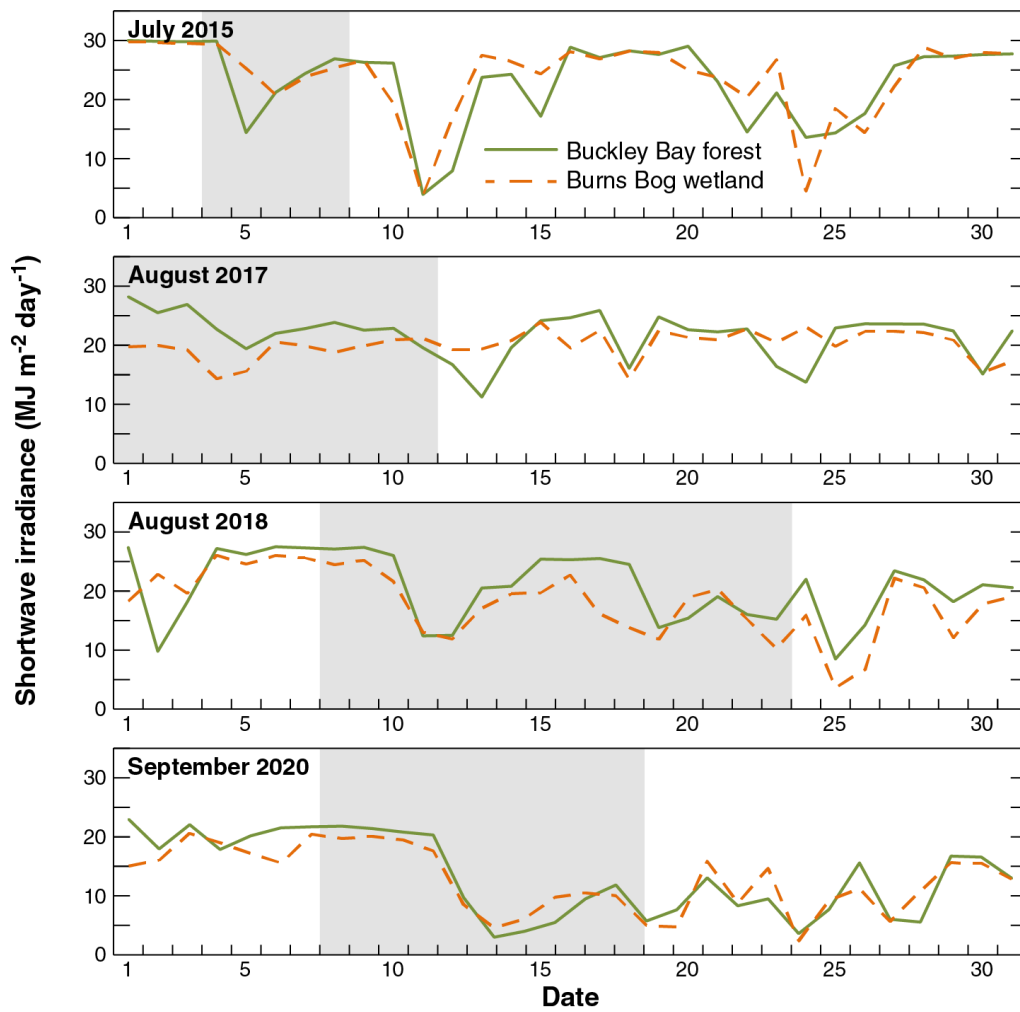

**Figure S2.** Daily shortwave irradiance over the wildfire smoke episodes (shaded) in 2015, 2017, 2018, and 2020 at Buckley Bay (the forest site) and at Burns Bog (the peatland site).

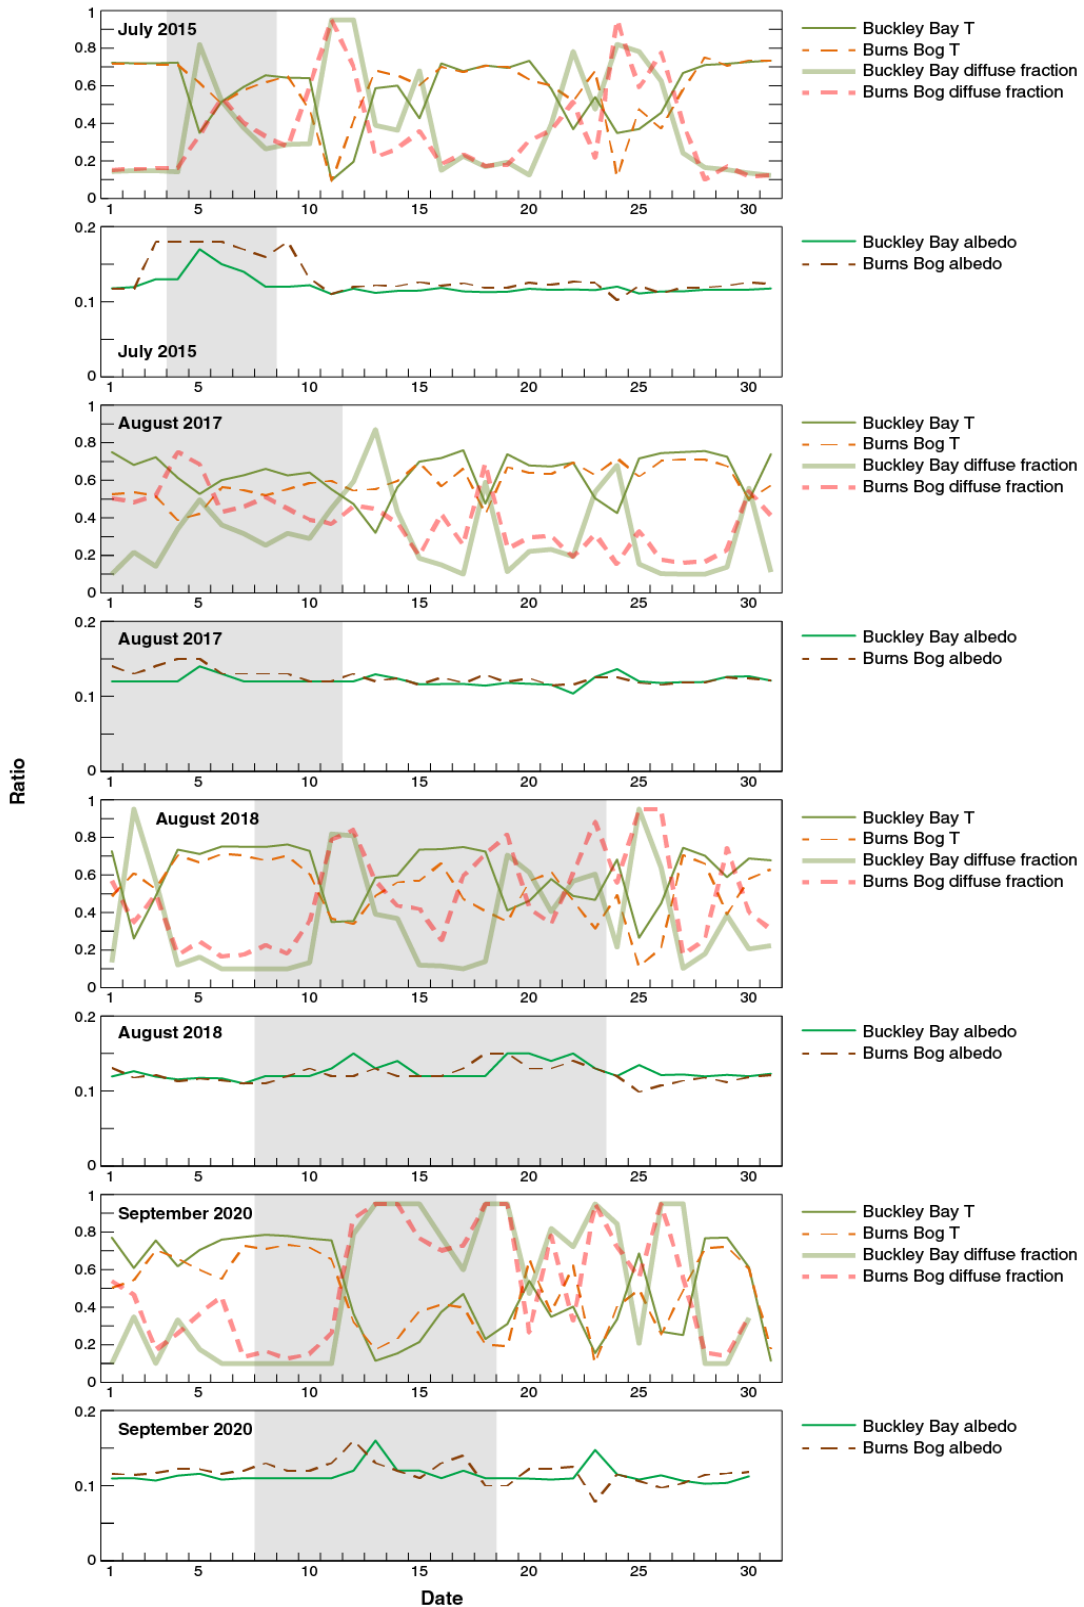

**Figure S3.** Daily averages of transmissivity ( $T$ ), albedo, and diffuse fraction of photosynthetically active radiation (PAR) at the forest and wetland sites during the smoke events (shaded) in 2015, 2017, 2018, and 2020.

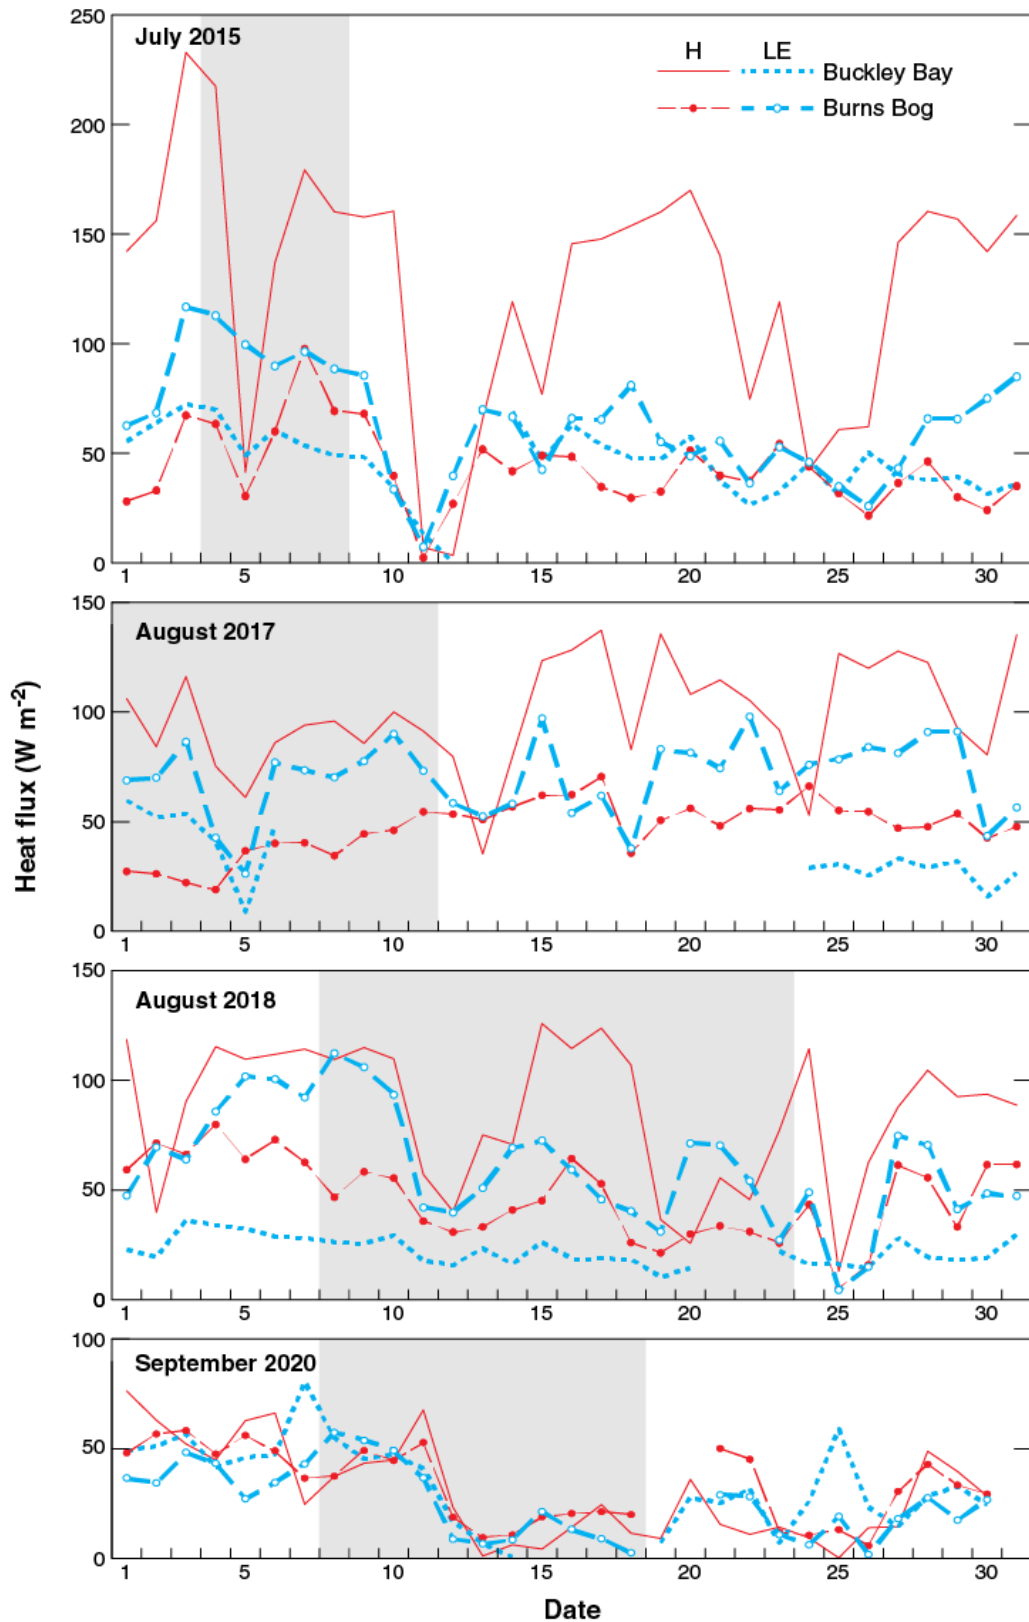

**Figure S4.** Daily (24-h) averages of sensible heat flux ( $H$ ) and latent heat flux ( $LE$ ) at the forest and wetland sites during the smoke events (shaded) in 2015, 2017, 2018, and 2020.

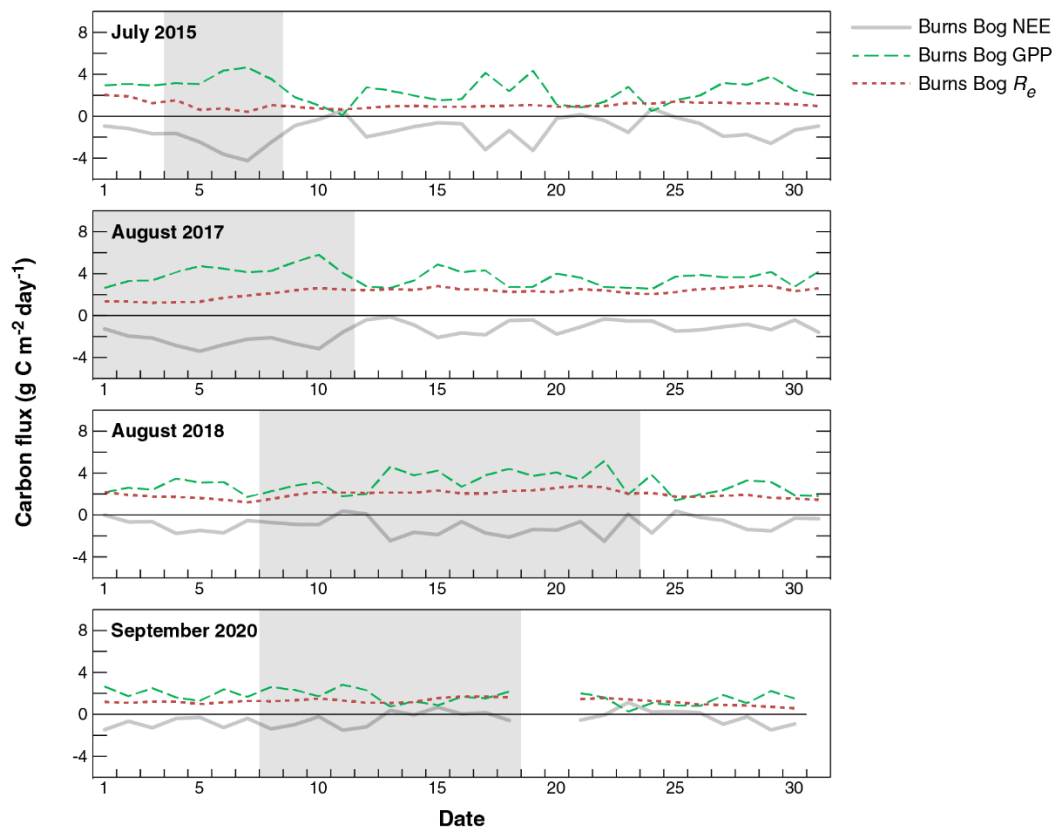

**Figure S5.** Daily totals of net ecosystem exchange (NEE), gross primary production (GPP), and ecosystem respiration ( $R_e$ ) at the wetland site during the smoke events (shaded) in 2015, 2017, 2018, and 2020.

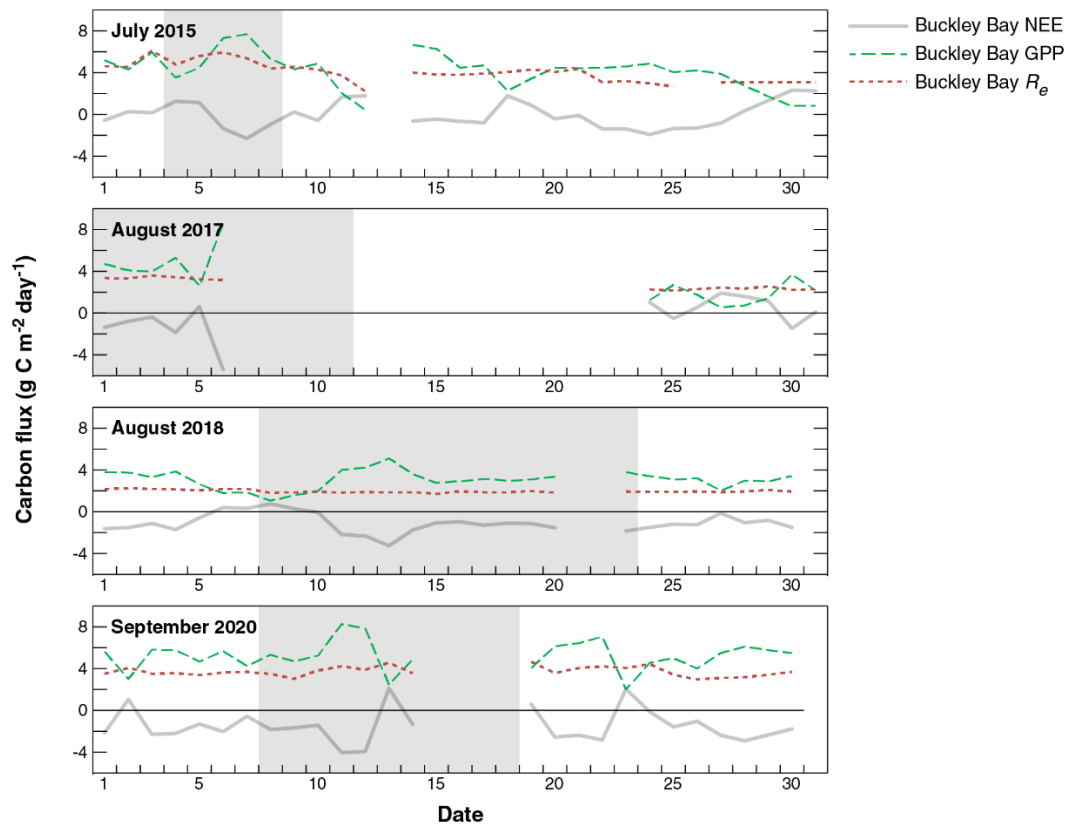

**Figure S6.** Daily totals of net ecosystem exchange (NEE), gross primary production (GPP), and ecosystem respiration ( $R_e$ ) at the forest site during the smoke events (shaded) in 2015, 2017, 2018, and 2020.
